# Supplementary material for: Identification of Orbivirus Non-Structural Protein 5 (NS5), Its Role and Interaction with RNA/DNA in Infected Cells
Source: MDPI journal article supplement (doi:10.3390/ijms24076845), 2023-04-06
Supplement: s1 [file s1]

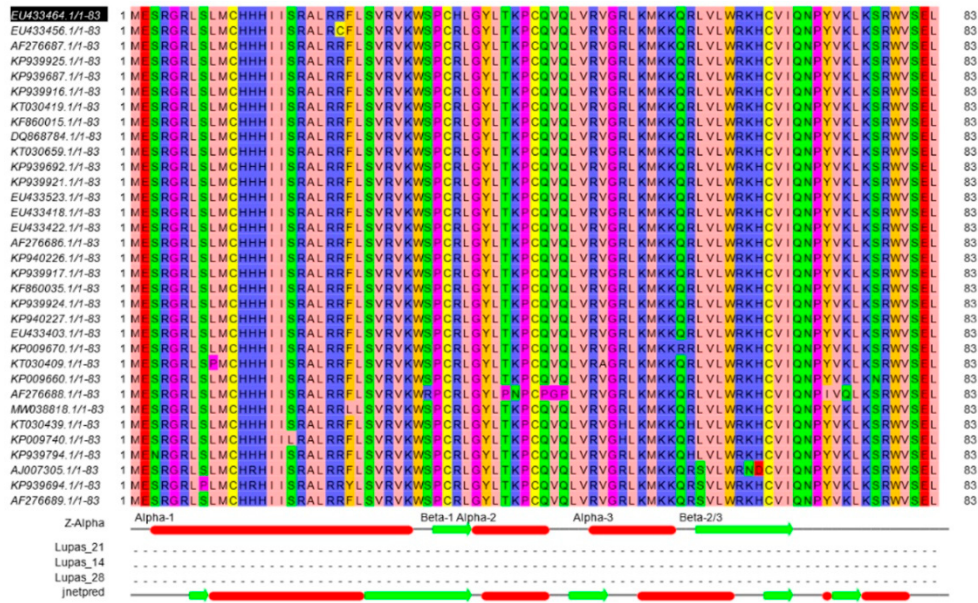

**Figure S3:** alignment of AHSV NS5 sequences and prediction of secondary structure by JPred. The predicted structure is globally similar to the Z-alpha domain of ZBP1 and vaccinia virus E3L.

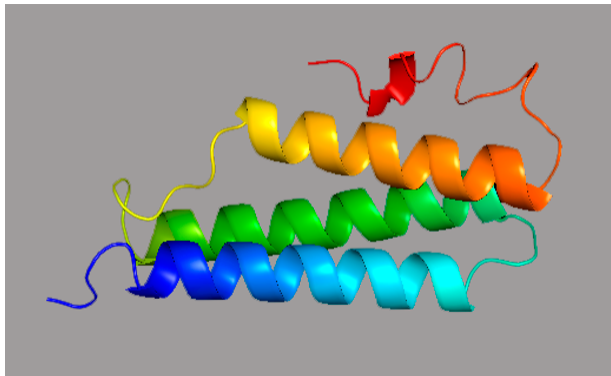

**Figure S4:** Predicted structure of NSP6 using Raptor. The predicted structure is mainly alpha helical.

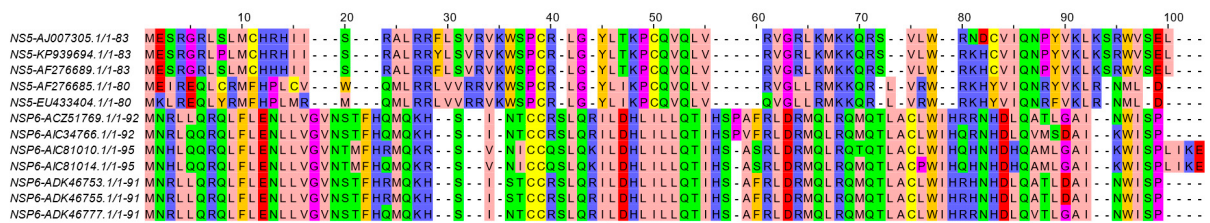

**Figure S5:** Alignment of representative AHSV NS5 sequences with rotavirus A NSP6. The two proteins have similar sizes. The two proteins show conserved residues/motifs, suggesting that they may represent orthologues.

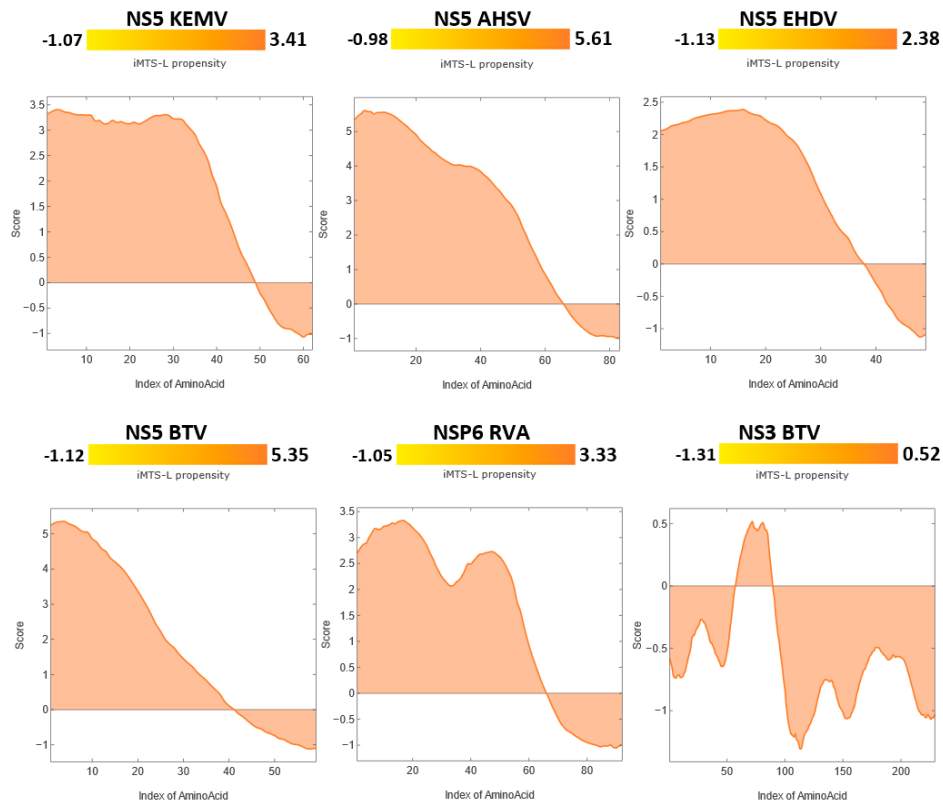

**Figure S6:** iMTS-L scores and propensity heatmap showing a high potential for orbivirus NS5 sequences to localise into the mitochondrial matrix. Similar scores are identified for rotavirus A NSP6. Previous studies (immunofluorescence) concluded that NSP6 localises to the mitochondria, which is also predicted in the current study by iMLP. The potential localisation of orbivirus NS5 to mitochondria is assessed in the current study by immunofluorescence analyses.

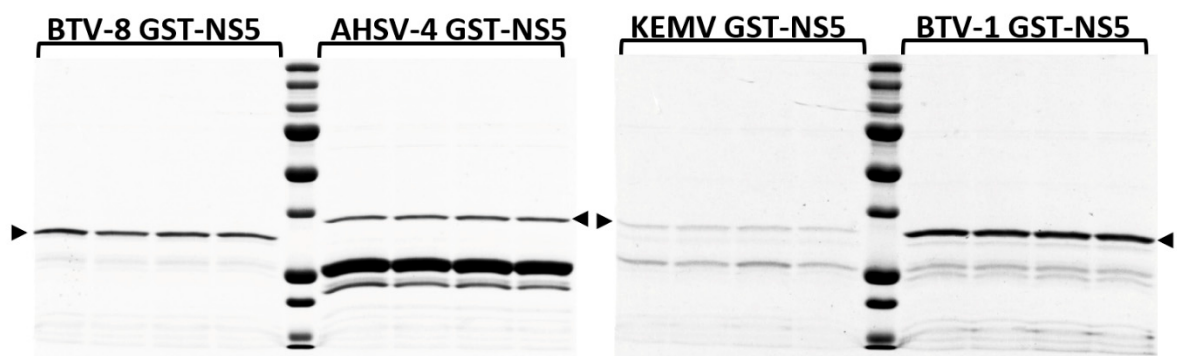

**Figure S7:** Glutathione affinity purified GST-fused NS5 of BTV-1, BTV-8, AHSV-4 and KEMV. The proteins were analysed by PAGE on a 10% polyacrylamide gel and stained with Coomassie blue. The full-length fusion protein is indicated by an arrow. Some degradation is visible below the full-length protein.

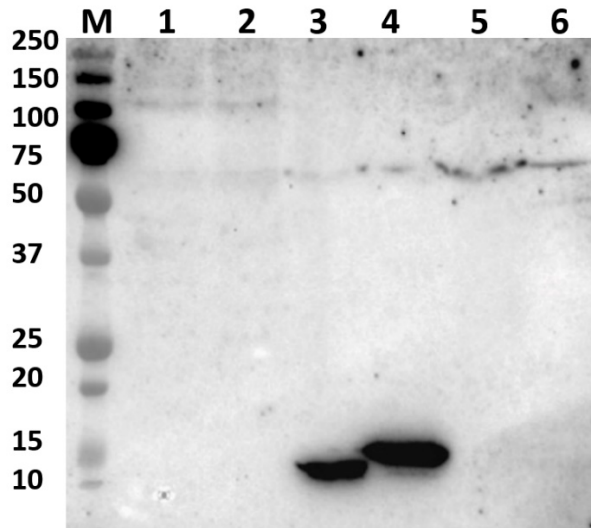

**Figure S8: Western blot analysis of pulldown products from BSR cells expressing his-tagged NS5 of BTV-1 or AHSV-4.**

Anti-histag antibodies were used detecting his-NS5 of BTV-1 or AHSV-4 with high sensitivity. Non-specific protein bands were also detected in both transfected and non-transfected cells but with significantly lower sensitivity. Lane M: size marker labelled in kDa, lane 1 and 2: total BSR cell lysate, lane 3: pulldown BTV-1 NS5, lane 4: pulldown AHSV-4 NS5, lanes 5 and 6: pulldown non-transfected BSR lysates.

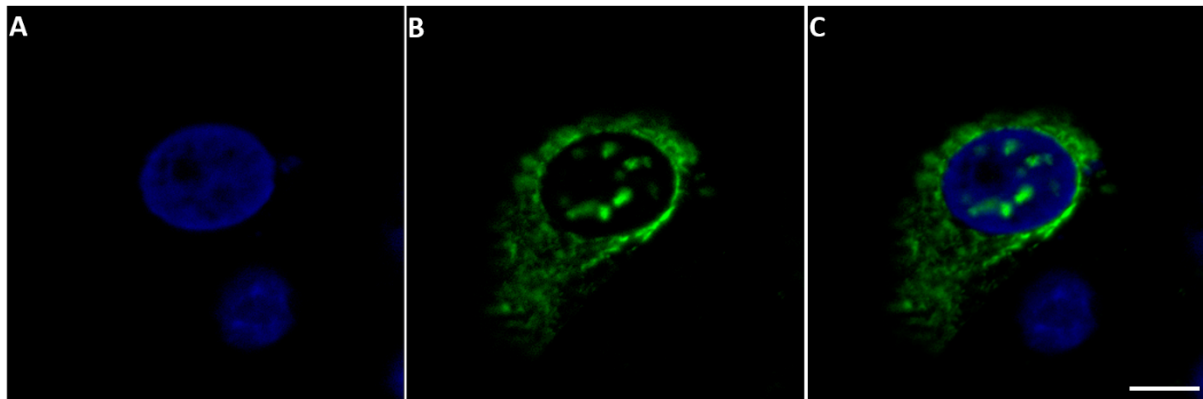

**Figure S9: Confocal immunofluorescence microscopy analysis of NS5 expression in BTV-1 infected BSR cells.**

Anti-NS5 antibodies identify NS5 both in the cytoplasm and to a lesser extent in the nucleus. Mouse serum was adsorbed onto non-infected BSR cells to remove any potential non-specific antibodies. **A:** nuclei coloured by DAPI, **B:** NS5 signal identified by mouse anti-NS5 of BTV-1 and revealed by Alexa Fluor 488 (green fluorescence) conjugated anti-mouse IgG, **C:** a merge of A and B panels. Scale bar represents 5µm.

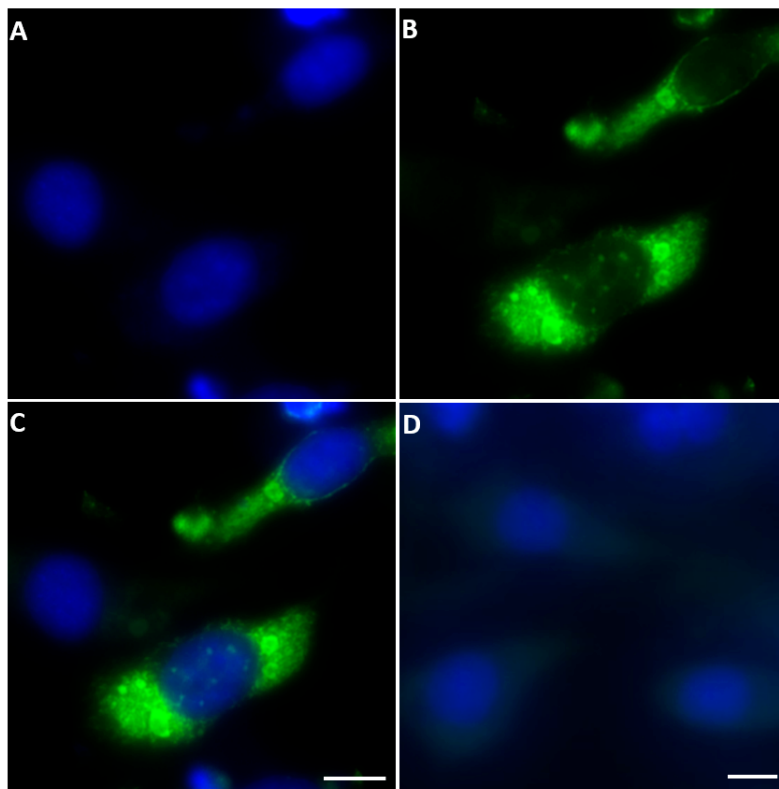

**Figure S10: Immunofluorescence microscopy analysis of NS5 expression in BTV-8 RSArrrr/08 infected BSR cells.**

Anti-NS5 antibodies identified NS5 both in the cytoplasm and at a lower level in the nucleus of BTV-8 infected BSR cells. **A:** nuclei coloured by DAPI, **B:** NS5 signal identified by anti-BTV-8 NS5 antibodies and revealed by Alexa Fluor 488 (green fluorescence) conjugated anti-mouse IgG, **C:** a merge of A and B panels and **D:** non-infected BSR cells tested with anti-BTV-8 NS5 antibodies and Alexa Fluor 488 (green fluorescence) conjugated anti-mouse IgG (negative for NS5 detection). Scale bar represents 5 $\mu$ m.

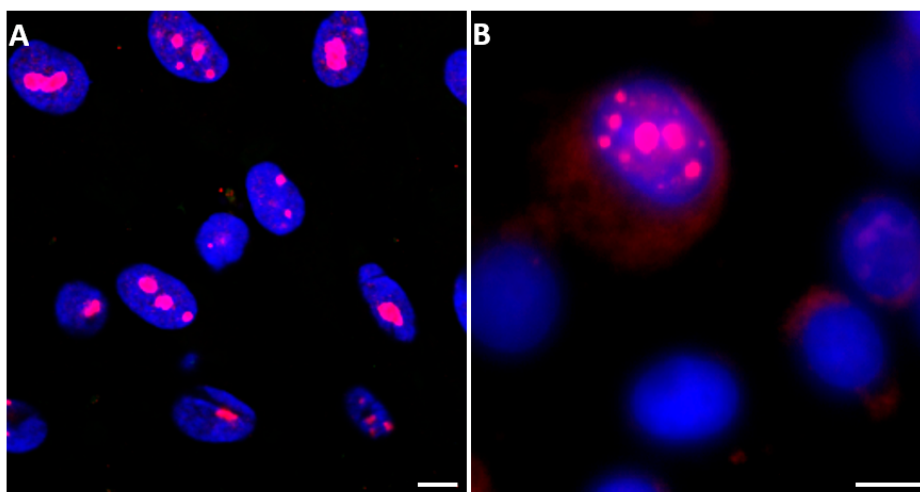

Figure

S11:

**Immunofluorescence microscopy showing NS5 expression in BTV-1ΔNS5 infected BSR cells.**

Immunofluorescence microscopy using pre-adsorbed mouse anti-NS5 serum and Alexa Fluor 488 conjugated anti-mouse IgG, did not detect NS5 in infected BSR cells (result not shown). **A:** BTV-1ΔNS5 infected cells probed with rabbit anti-fibrillarin antibodies and Alexa Fluor 568 conjugated anti-rabbit antibodies, revealed fibrillarin in the nucleoli (red fluorescence). **B:** BTV-1ΔNS5 infected BSR cells, probed with rabbit anti-NS4 antibodies and Alexa Fluor 568 conjugated anti-rabbit antibodies, also detected NS4 in the nucleoli and in the cytoplasm. Scale bar represents 5μm.

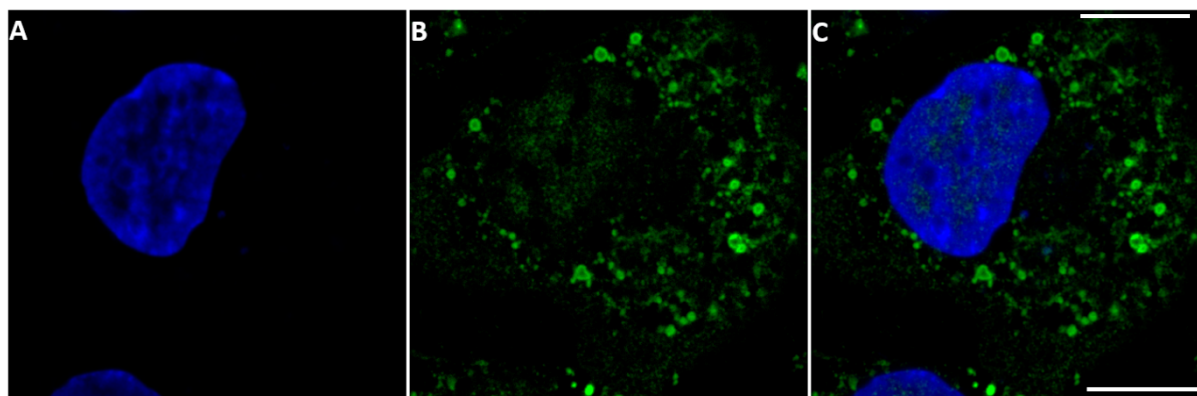

**Figure S12: Confocal immunofluorescence microscopy analysis of NS5 expression in AHSV-4 morocco infected BSR cells.**

Anti-NS5 of AHSV-4 antibodies identified NS5 both in the cytoplasm and in the nucleus of infected BSR cells. **A:** nuclei coloured by DAPI. **B:** NS5 signal identified by anti-NS5 of AHSV-4 antibodies and Alexa Fluor 488 (green fluorescence) conjugated anti-mouse IgG. **C:** a merge of **A** and **B** panels. Scale bar represents 5μm.

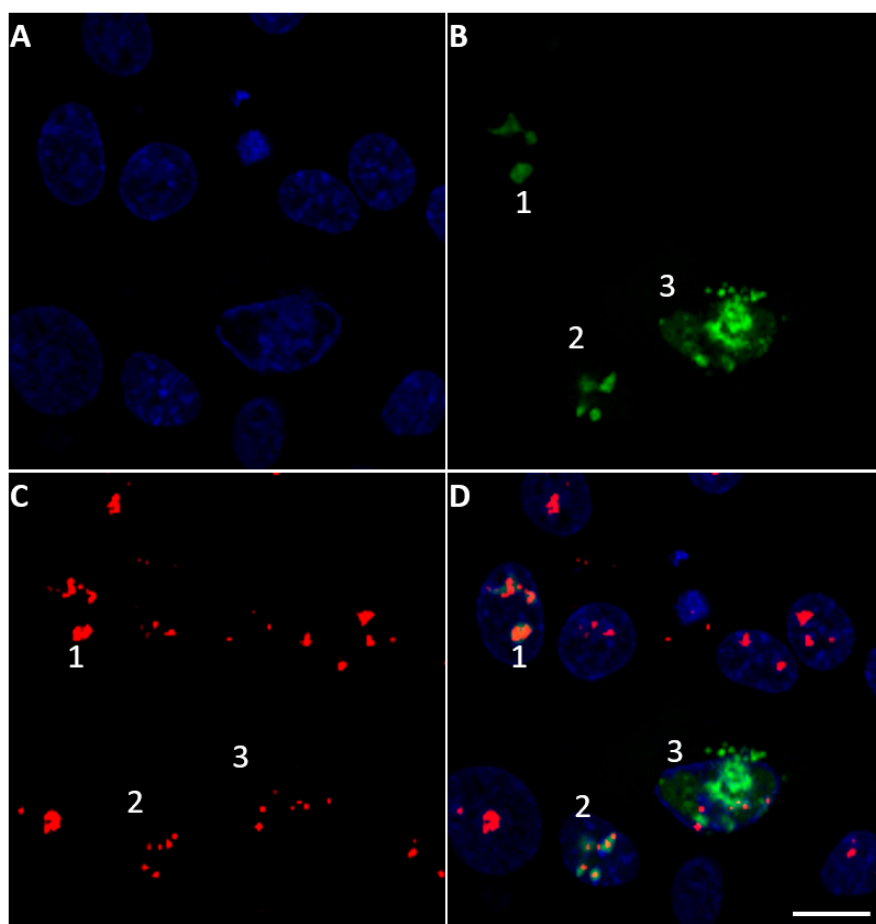

**Figure S13: Detection of NS5 expression in confocal immunofluorescence microscopy of BTV-1 infected BSR cells at 16h post-infection.**

Anti-BTV-1 NS5 antibodies mainly detected NS5 in the nucleus although it was also starting to accumulate in the cell-cytoplasm. **A:** cells stained with DAPI, **B:** cells probed anti-BTV-1 NS5 antibodies and Alexa Fluor 488 conjugated anti-mouse IgG (green), **C:** cells probed with anti-fibrillarlin antibodies and Alexa Fluor 568 anti-rabbit IgG (red) and **D:** merge of **A**, **B** and **C**. Three infected cells (at different stages of infection) are indicated by numbers (1, 2 and 3). In cell 1, NS5 appears to localize to the nucleoli. In cell 2, smaller nucleolar structures are observed which are still associated with NS5. In cell 3, NS5 is visible across the nucleus and in the cytoplasm as well. Scale bar represents 5 $\mu$ m.

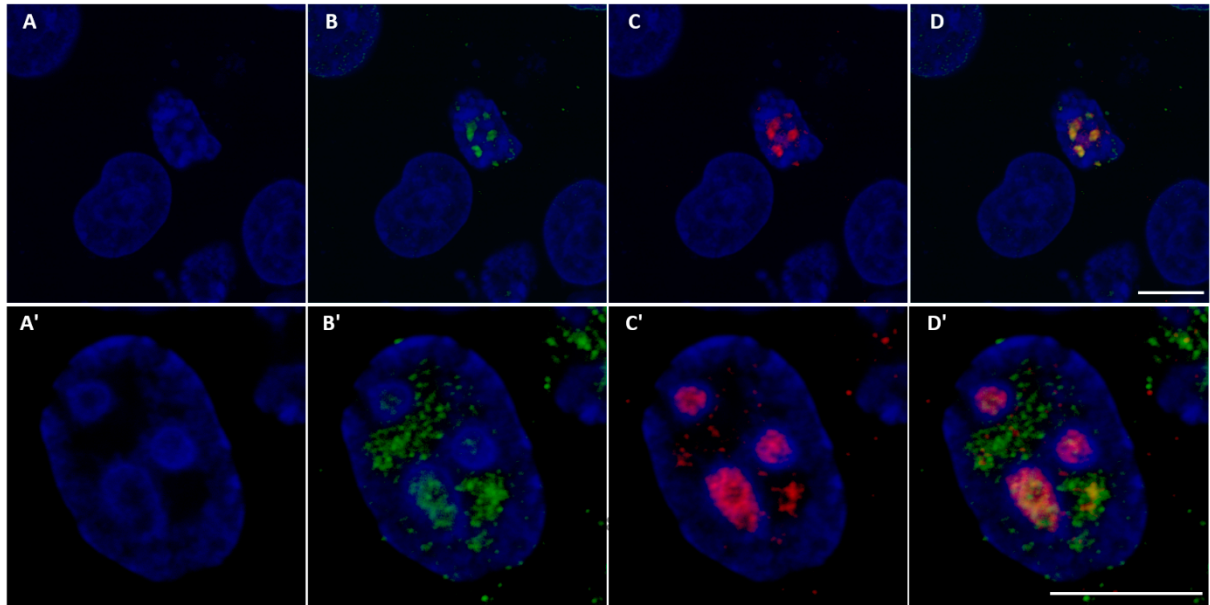

**Figure S14:** Confocal immunofluorescence microscopy of cells expressing NS5 and NS4 of BTV-1 at 24hrs post-transfection. **A or A':** cells were stained with DAPI, **B or B':** NS5 expression (green) visible in the nucleus as well as in the cytoplasm of certain cells and was detected using mouse anti-NS5 antisera and Alexa Fluor 488 conjugated anti-mouse IgG, **C or C':** NS4 expression (red) visible in the nucleus as well as in the cytoplasm of certain cells and was detected using rabbit anti-NS4 antisera and Alexa Fluor 568 conjugated anti-rabbit IgG, **D:** merge of **A**, **B** and **C** and **D':** merge of **A'**, **B'** and **C'**. Scale bar represents 5μm.

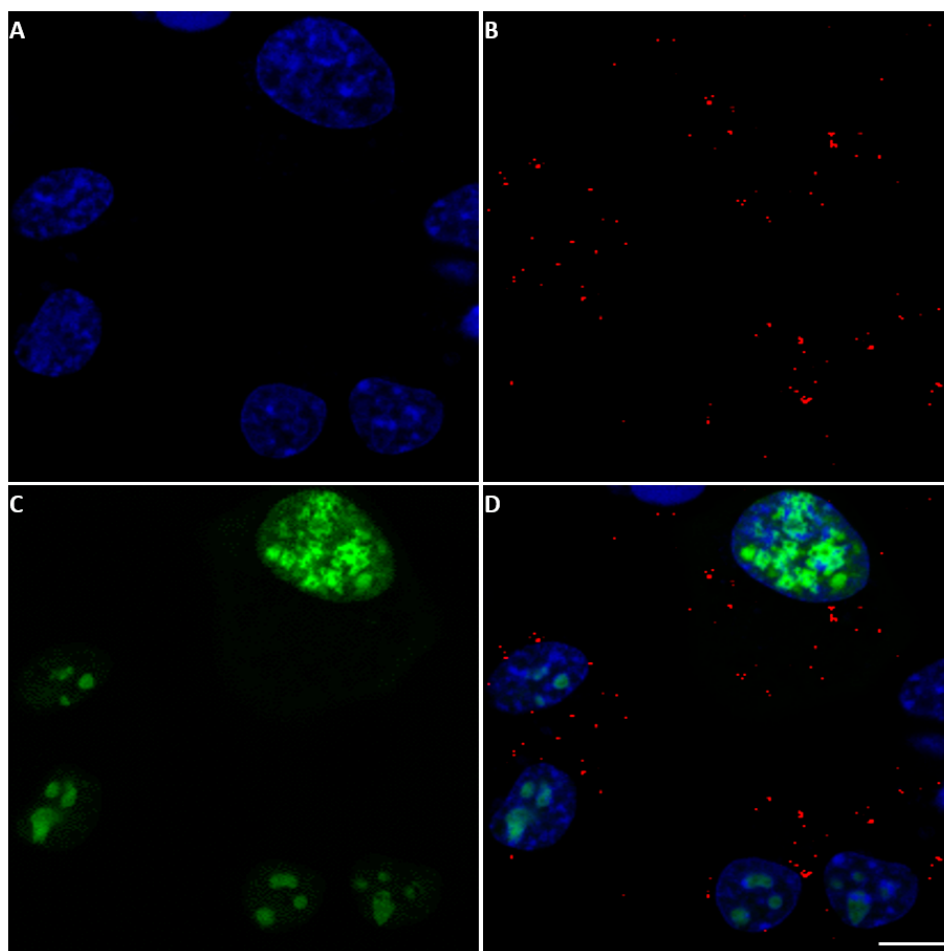

**Figure S15: Confocal immunofluorescence microscopy of cells transfected with pCI-BTV1NS5/BTV4VP5, expressing NS5 and VP5 of BTV, at 24 hrs post-transfection.**

**A:** cells were stained with DAPI, **B:** VP5 expression (red) was detected using anti-VP5 antibodies and is visible in the cytoplasm of cells, **C:** NS5-GFP (green) is mainly visible in the nucleus, and **D:** merge of **A**, **B** and **C**. scale bar represents 5μm.

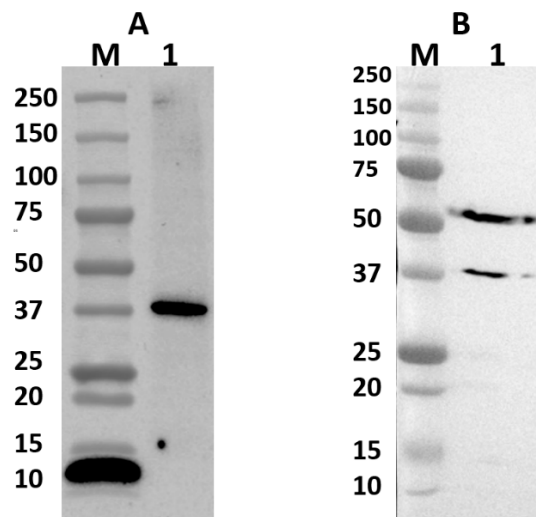

**Figure S16: Western blot analysis for ZBP1 expression in HeLa cells and BSR cells:**

In panel A; Lane M: size marker labelled in kDa, lane 1: western blot of total HeLa cell lysate probed with antibody to human ZBP1 and showing an intense band at around 40kDa. In Panel B; Lane M: size marker labelled in kDa; lane 1: western blot of total BSR cell lysate probed with antibody to human ZBP1 showing two band at around 40kDa and 50kDa. The Genbank database contains sequences of 4 isoforms for the ZBP1 of the Syrian golden hamster (from which BSR cells are derived). These are isoform X1 (428aa, accession XP\_040588843), isoform X2, (421aa, accession XP\_040588844.1), isoform X3 (406aa, accession XP\_005074637) and isoform X4 (402aa, accession XP\_040588845). The theoretical sizes of these 4 isoforms range from 42 to 45kDa.

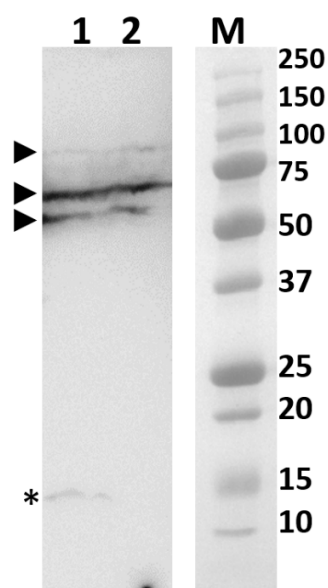

**Figure S17:** Western blot analysis of BSR cell lysates. BSR cells-specific bands can be observed in western blots of BSR lysates either mock transfected or transfected with pCI-BTV1NS5-6xHis. Cells were harvested at 24hrs post-transfection and washed 3 times with PBS. Cell pellets were directly dissolved in sample denaturation buffer and analysed by SDS-PAGE and western blot using anti-6xHis antibodies. Lane M: size marker labelled in kDa. Western blot analysis was performed using anti-6xHis antibodies. Cells expressing NS5 of BTV-1 (transfected with pCI-BTV1NS5-6xHis plasmid) in lane 1, show a band at ~15kDa, which is absent from non-transfected cells in lane 2. Non-specific protein bands (with sizes of ~65, 75 and 100 kDa) are clearly identified by the anti-6xHis antibodies in both lanes 1 and 2.

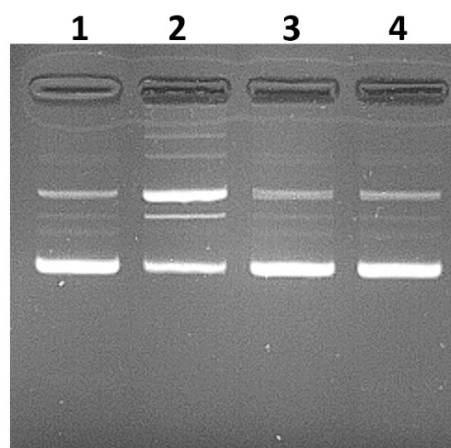

**Figure S18: Electrophoretic mobility shift assays showing the effect of divalent cations on the binding of DNA to NS5 of BTV:**

Protein-DNA binding reactions were performed in 0.5X TBE buffer containing 100 mM NaCl and 5 mM of  $MgCl_2$ ,  $CaCl_2$  or  $ZnCl_2$ , incubated for 30 minutes at RT. Products were analysed by electrophoresis on 1% agarose in 0.5X TBE containing 100 mM NaCl. Nucleic acids were visualized after electrophoresis by UV transillumination in the presence of ethidium bromide. Lane 1: pCIneo-24CG plasmid (100 ng). Lane 2: pCIneo-24CG plasmid (100 ng) plus 100 ng of BTV GST-fused NS5 in presence of  $MgCl_2$ . Lane 3: Lane 2 plus 100 ng of BTV GST-fused NS5 in presence of  $CaCl_2$ . Lane 4: pCIneo-24CG plasmid (100 ng) plus 100 ng of BTV GST-fused NS5 in presence of  $ZnCl_2$ .

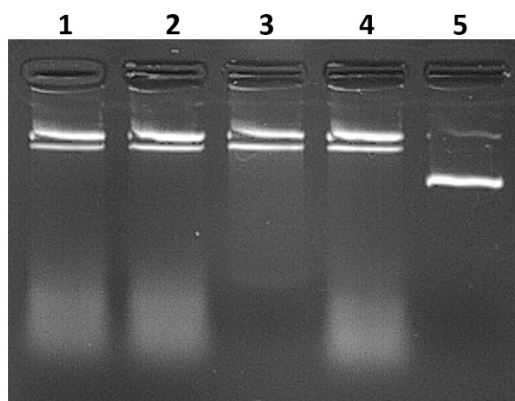

**Figure S19: Electrophoretic mobility shift assays of GST-fused NS5 of AHSV**

All protein-DNA binding reactions were performed in 0.5X TBE buffer containing 100 mM NaCl and 5 mM MgCl<sub>2</sub>. Reactions were incubated for 30 minutes then analysed in 1% agarose gel containing TBE 0.5x and 100 mM NaCl. Nucleic acids were visualized after electrophoresis by UV transillumination in the presence of ethidium bromide. Lanes 1, 2 and 4: pCIneo-24CG plasmid (100ng) together with 100ng of AHSV GST-fused NS5, Lane 3: pCIneo-24CG plasmid (100ng) together with 5ng of AHSV GST-fused NS5 and Lane 5: pCIneo-24CG plasmid (100ng) only.

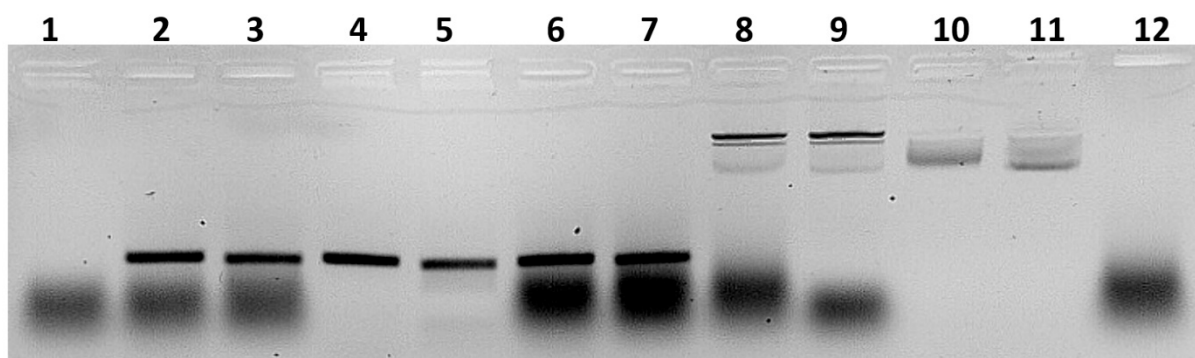

**Figure S20: Electrophoretic mobility shift assays of GST-fused NS5 of BTV-8 or KEMV with linear DNA:**

All protein-DNA binding reactions were performed in 0.5X TBE buffer containing 100 mM NaCl and 5 mM MgCl<sub>2</sub>. Reactions were incubated for 30 minutes then analysed by electrophoresis in 1% agarose gel containing TBE 0.5x and 100 mM NaCl. Nucleic acids were visualized after electrophoresis by UV transillumination in the presence of ethidium bromide. PCR products of ~1000 bp long were used in the assays. Two distinct PCR products were used, one containing a Zeocin resistance gene and the other a ccdB. The PCR product containing Zeocin resistance gene has a mean G+C content of 52% (the zeocin sequence itself is 375 bp-long and has a G+C content of 69%). The product containing ccdB has a mean G+C content of 43% (the ccdB sequence itself is 232 bp-long and have a G+C content of 27%). Lane 1: 100ng of GST-fused KEMV NS5. Lane 2: 100ng of GST-fused KEMV NS5 in presence of 100ng of PCR product containing the zeocin sequence. Lane 3: 100ng of GST-fused KEMV NS5 in presence of 100ng of PCR product containing the ccdB sequence. Lane 4: 100ng of PCR product containing the zeocin sequence. Lane 5: 100ng of PCR product containing the ccdB sequence. Lane 6: 100ng of GST-fused BTV-8 NS5 in presence of 100ng of PCR product containing the zeocin sequence. Lane 7: 100ng of GST-fused BTV-8 NS5 in presence of 100ng of PCR product containing the ccdB sequence. Lane 8: 100ng of GST-fused BTV-8 NS5 in presence of 100ng of pCIneo plasmid (circular). Lane 9: 100ng of GST-fused BTV-8 NS5 in presence of 100ng of pCIneo-24CG plasmid (circular). Lane 10: 100ng of pCIneo plasmid (circular). Lane 11: 100ng of pCIneo-24CG plasmid (circular). Lane 12: 100ng of GST-fused BTV-8 NS5 only.

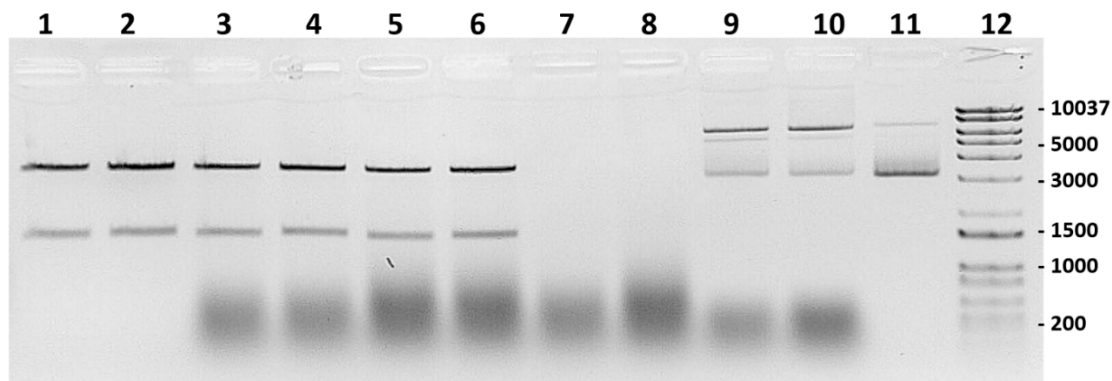

**Figure S21: EMSA for GST-fused NS5 of BTV-8 or KEMV with HindIII linearised plasmids pCIneo and pCIneo-24CG.**

All protein-DNA binding reactions were performed in 0.5X TBE buffer containing 100 mM NaCl and 5 mM MgCl<sub>2</sub>. Reactions were incubated for 30 minutes then analysed by electrophoresis in 1% agarose gel containing TBE 0.5x and 100 mM NaCl. Nucleic acids were visualized after electrophoresis by UV transillumination in the presence of ethidium bromide. Lane 1: 100ng of cleaved pCIneo plasmid, Lane 2: 100ng of cleaved pCIneo-24CG plasmid, lane 3: 100ng of cleaved pCIneo plasmid plus 100ng of GST-fused KEMV NS5, lane 4: 100ng of cleaved pCIneo-24CG plasmid plus 100ng of GST-fused KEMV NS5, lane 5: 100ng of cleaved pCIneo plasmid plus 100ng of GST-fused BTV-8 NS5, lane 6: 100ng of cleaved pCIneo-24CG plasmid plus 100ng of GST-fused BTV-8 NS5, lane 7: 100ng of GST-fused KEMV NS5, lane8: 100ng of GST-fused BTV-8 NS5, lane 9: 100ng of circular pCIneo-24CG plasmid plus 100ng of GST-fused KEMV NS5, lane 10: 100ng of circular pCIneo-24CG plasmid plus 100ng of GST-fused BTV-8 NS5, Lane 11: 100ng of circular pCIneo-24CG plasmid only and lane 12: DNA size marker.

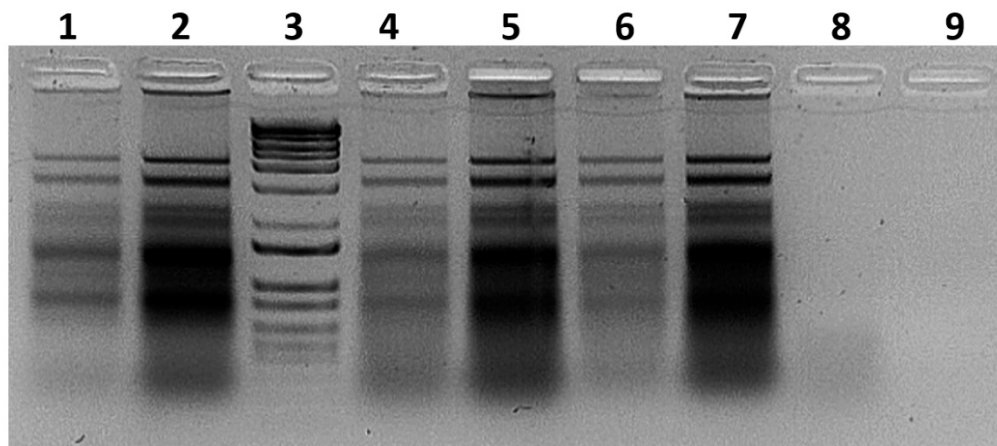

**Figure S22: EMSA for GST-fused NS5 of BTV-8 with genomic dsRNA of BTV in 1% agarose gel containing TBE 0.5x and 100 mM NaCl.** All protein-DNA binding reactions were performed in 0.5X TBE buffer containing 100 mM NaCl and 5 mM MgCl<sub>2</sub>. Reactions were incubated for 30 minutes at RT. Lanes 1 and 2: 20 and 200ng of dsRNA, lane 3: DNA size marker, lane 4: 20ng of dsRNA plus 100ng of GST-fused BTV-8 NS5, lane 5 : 200ng of dsRNA plus 100ng of GST-fused BTV-8 NS5, lane 6: 20ng of dsRNA plus 5ng of GST-fused BTV-8 NS5, lane 7: 200ng of dsRNA plus 5ng of GST-fused BTV-8 NS5, 100ng of pCIneo-24CG plasmid only, lane 8: 100 ng of GST-fused BTV-8 NS5, lane 9: 5ng of GST-fused BTV-8 NS5.

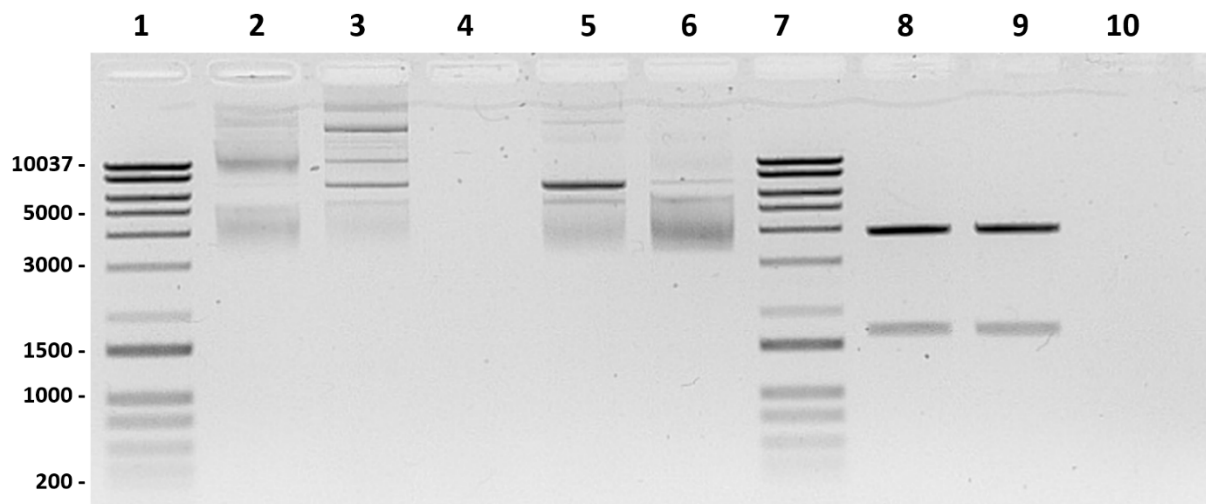

**Figure S23: EMSA for GST-fused NS5 of BTV-8 with plasmids pCIneo or pCIneo-24CG**

All protein-DNA binding reactions were performed in 0.5X TBE buffer containing 100 mM NaCl and 5 mM MgCl<sub>2</sub>. Reactions were incubated for 30 minutes then analysed by electrophoresis in 1% agarose gel containing TBE 0.5x and 100 mM NaCl. Nucleic acids were visualized after electrophoresis by UV transillumination in the presence of ethidium bromide. Lanes 1 and 7: DNA size marker, lane 2: 100ng of pCIneo plasmid, lane 3: 100ng of pCIneo plasmid plus 5ng of GST-fused BTV-8 NS5, lane 4: 5 ng of GST-fused BTV-8 NS5, lane 5: 100ng of pCIneo-24CG plasmid plus 5ng of GST-fused BTV-8 NS5, lane 6: 100ng of pCIneo-24CG plasmid only, lane 8: HindIII cleaved pCIneo24CG (100ng), lane 9: HindIII cleaved pCIneo24CG (100ng) plus 5ng of GST-fused BTV-8 NS5, lane 10: 5ng of GST-fused BTV-8 NS5.

#### Wild-type Seg-10

|           |                                                                                            |     |     |     |   |   |   |   |   |   |   |   |   |   |   |   |   |   |   |   |   |   |   |   |   |   |   |   |   |   |
|-----------|--------------------------------------------------------------------------------------------|-----|-----|-----|---|---|---|---|---|---|---|---|---|---|---|---|---|---|---|---|---|---|---|---|---|---|---|---|---|---|
|           | 101                                                                                        | 121 | 141 | 161 |   |   |   |   |   |   |   |   |   |   |   |   |   |   |   |   |   |   |   |   |   |   |   |   |   |   |
|           |                                                                                            |     |     |     |   |   |   |   |   |   |   |   |   |   |   |   |   |   |   |   |   |   |   |   |   |   |   |   |   |   |
|           | GAGTCTGGTCCGTGTGGATGACACGATTTCCCAACCGCCGAGATATGCTCCGAGTGCGCCTATGCCATCGTCGATGCCTACTGTTGCACT |     |     |     |   |   |   |   |   |   |   |   |   |   |   |   |   |   |   |   |   |   |   |   |   |   |   |   |   |   |
| NS3 Frame | S                                                                                          | L   | V   | R   | V | D | D | T | I | S | Q | P | P | R | Y | A | P | S | A | P | M | P | S | S | M | P | T | V | A | L |
| NS5 Frame | -                                                                                          | V   | W   | S   | V | W | M | T | R | F | P | N | R | R | D | M | L | R | V | R | L | C | H | R | R | C | L | L | L | H |

#### Mutated Seg-10

|           |                                                                                            |     |     |     |   |   |   |   |   |   |   |   |   |   |   |   |   |   |   |   |   |   |   |   |   |   |   |   |   |   |
|-----------|--------------------------------------------------------------------------------------------|-----|-----|-----|---|---|---|---|---|---|---|---|---|---|---|---|---|---|---|---|---|---|---|---|---|---|---|---|---|---|
|           | 101                                                                                        | 121 | 141 | 161 |   |   |   |   |   |   |   |   |   |   |   |   |   |   |   |   |   |   |   |   |   |   |   |   |   |   |
|           |                                                                                            |     |     |     |   |   |   |   |   |   |   |   |   |   |   |   |   |   |   |   |   |   |   |   |   |   |   |   |   |   |
|           | GAGTCTGGTCCGTGTGGACGACACGATTTCCCAACCGCCGAGATACGCTCCGAGTGCGCCTATGCCATCGTCGATGCCTACTGTTGCACT |     |     |     |   |   |   |   |   |   |   |   |   |   |   |   |   |   |   |   |   |   |   |   |   |   |   |   |   |   |
| NS3 Frame | S                                                                                          | L   | V   | R   | V | D | D | T | I | S | Q | P | P | R | Y | A | P | S | A | P | M | P | S | S | M | P | T | V | A | L |
| NS5 Frame | -                                                                                          | V   | W   | S   | V | W | T | T | R | F | P | N | R | R | D | T | L | R | V | R | L | C | H | R | R | C | L | L | L | H |

**Figure S24: mutation of the two in-frame ATG codons of the NS5 ORF. The nucleotide T109C and T136C mutations do not modify the amino acid sequence of NS3.**

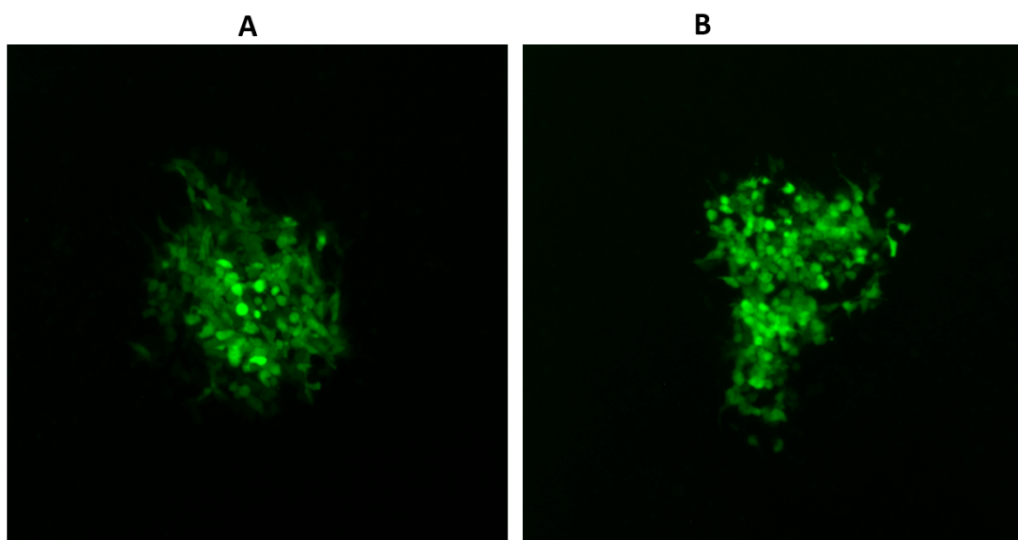

**Figure S25:** Fluorescent-plaques of recombinant Vaccinia virus. **A:** a fluorescent plaque of VV-VP1080-E3L. **B:** a fluorescent plaque of VV-VP1080-NS5.

| Primer                 | Sequence (5'→3')                                                          | Restriction enzyme | Target                             |
|------------------------|---------------------------------------------------------------------------|--------------------|------------------------------------|
| NS5BTV-8RSAPGEXFORECO  | ctcaac <b>GAATTC</b> ATGACACGATCTCCCAACCACCG                              | EcoRI              | NS5 BTV-8                          |
| NS5BTV-8RSAPGEXRevNot  | gatgagat <b>GCGGCCGCG</b> CATCATCACGAAACGCTTCTGC                          | NotI               | NS5 BTV-8                          |
| NS5BTV-1RSAPGEXFORECO  | ctcaac <b>GAATTC</b> ATGACACGATTTCCTCCCAACGCCG                            | EcoRI              | NS5 BTV-1                          |
| NS5BTV-1RSAPGEXRevNot  | gatgagat <b>GCGGCCGCG</b> CGTCATCACGAAACGCTTCTG                           | NotI               | NS5 BTV-1                          |
| NS5AHSV-4PGEXFORECO    | ctcaac <b>GAATTC</b> ATGGAGAGTCGGGGGCGATTG                                | EcoRI              | NS5 AHSV-4                         |
| NS5AHSV-4PGEXRevNot    | gatgagat <b>GCGGCCGCG</b> AAGTTCTGATACCCACCTGCTTT                         | NotI               | NS5 AHSV-4                         |
| NS5AHSV-7PGEXFORECO    | ctcaac <b>GAATTC</b> ATGGAAATCAGAGAGCAATTGTGC                             | EcoRI              | NS5 AHSV-7                         |
| NS5AHSV-7PGEXRevNot    | gatgagat <b>GCGGCCGCG</b> ATCCAACATGTTTCTTAATTTGACGTATCGG                 | NotI               | NS5 AHSV-7                         |
| NS5KEMVPGEXFORECO      | ctcaac <b>GAATTC</b> ATGTCGCTCTTGGCGTTCTAC                                | EcoRI              | NS5 KEMV                           |
| NS5KEMVPGEXRe5Not      | gatgagat <b>GCGGCCGCG</b> GTTTCGCCAGGGTGCGCTCCG                           | NotI               | NS5 KEMV                           |
| NS5EHDV-7ISRPGEXFORECO | ctcaac <b>GAATTC</b> ATGTACCGTCAGTCCAATACCCAC                             | EcoRI              | NS5 EHDV-7                         |
| NS5EHDV-7ISRPGEXRevNot | gatgagat <b>GCGGCCGCG</b> AATCATCTCTAAATGCCTCCGCGTACG                     | NotI               | NS5 EHDV-7                         |
| NS5BTV8EcoFor          | gattct <b>GAATTC</b> ACGATGACACGATCTCCCAACC                               | EcoRI              | NS5 BTV-8                          |
| NS5BTV8NotREV          | acatgt <b>GCGGCCGCG</b> TCACATCATCACGAAACGCTTC                            | NotI               | NS5 BTV-8                          |
| NS5BTV8NotREVhis       | acatgt <b>GCGGCCGCG</b> <b>TCATGGTGATGGTGATGGTG</b> CATCATCACGAAACGCTTCTG | NotI               | NS5 BTV-8                          |
| NS5BTV1EcoFor          | gattct <b>GAATTC</b> ACGATGACACGATTTCCTCCCAACC                            | EcoRI              | NS5 BTV-1                          |
| NS5BTV1NotREV          | acatgt <b>GCGGCCGCG</b> <b>TCAC</b> CGTCATCACGAAACGCTTC                   | NotI               | NS5 BTV-1                          |
| NS5BTV1NotREVhis       | acatgt <b>GCGGCCGCG</b> <b>TCATGGTGATGGTGATGGTG</b> CGTCATCACGAAACGCTTCTG | NotI               | NS5 BTV-1                          |
| NS5AHSV4MarEcoFor      | gattct <b>GAATTC</b> ATAATGGAGAGTCGGGGGCGAT                               | EcoRI              | NS5 AHSV-4                         |
| NS5AHSV4MarNotRev      | acatgt <b>GCGGCCGCG</b> <b>TTA</b> AAGTTCTGATACCCACCTGC                   | NotI               | NS5 AHSV-4                         |
| NS5AHSV4MarNotRevHis   | acatgt <b>GCGGCCGCG</b> <b>TTAATGGTGATGGTGATGGTG</b> AAGTTCTGATACCCACCTGC | NotI               | NS5 AHSV-4                         |
| NS5KEMVEcoFor          | gattct <b>GAATTC</b> CGAATGTCGCTCTTGGCGTTCTAC                             | EcoRI              | NS5 KEMV                           |
| NS5KEMVNotRev          | acatgt <b>GCGGCCGCG</b> <b>TCAG</b> TTTCGCCAGGGTGCGC                      | NotI               | NS5 KEMV                           |
| NS5KEMVNotRevhis       | acatgt <b>GCGGCCGCG</b> <b>TCATGGTGATGGTGATGGTG</b> GTTTCGCCAGGGTGCGCTC   | NotI               | NS5 KEMV                           |
| eGFP-TAG_SapI          | tatc <b>GCTCTTCACTA</b> CTTGTACAGCTCGTCCATGCC                             | SapI               | eGFP                               |
| GS3G_eGFP-ATG_SapI     | tatc <b>GCTCTTCACTA</b> GCTTCAGGCGGAGGGATGGTGAGCAAGGGCGAGGA               | SapI               | eGFP                               |
| pCI_NS5-fusion_For     | tatc <b>GCTCTTCACTA</b> GGCGGCCGCTTCCCTTTAGTGA                            | SapI               | pCI-NS5BTV1 (plasmid sequence)     |
| pCI_NS5-fusion_Rev     | tatc <b>GCTCTTCTAC</b> CCGTCATCACGAAACGCTTCTGCGT                          | SapI               | pCI-NS5BTV1 (NS5-specific)         |
| pCI-insSV40-ORF_Rev    | tatc <b>GCTCTTCTCAT</b> GGTGGCTCTAGCCTTAAGTTC                             | SapI               | pCI-BTV1NS5-GFP (plasmid sequence) |
| pCI-insSV40-ORF_For    | tatc <b>GCTCTTCA</b> TAGCGGGACTCTGGGGTTTCA                                | SapI               | pCI-BTV1NS5-GFP (plasmid sequence) |
| BTV1VP5-ATG_SapI       | tatc <b>GCTCTTCA</b> ATGGGTAAAGTCATACGGTCTTAAG                            | SapI               | VP5 BTV-1                          |
| BTV1VP5-TAG_SapI       | tatc <b>GCTCTTCACTA</b> AGCATTTCGTAAGAAGAGTGGTACGT                        | SapI               | VP5 BTV-1                          |

**Table S1:** primers used for cloning into bacterial (pGEX) or mammalian plasmids. Sequence in lower case letter represent a non-specific tail to ensure efficient digestion by restriction enzymes. Sequences in non-italic bold characters are those of restriction enzyme sites. Underlined sequences are target specific. Sequences in italic bold characters encode the 6xHis tag. Glycine/glycine-serine linkers are underlined with a double line. Stop codons are shown in red.

| Primer                    | Sequence (5'→3')                                  | Target                                |
|---------------------------|---------------------------------------------------|---------------------------------------|
| Seg10BTV-1_mut2xM-NS5-For | <b>ACG</b> ACACGAUUUCCCAACCGCCGAGAU <b>ACG</b> CU | mutating ATG codons in NS5 ORF        |
| Seg10BTV-1_mut2xM-NS5-Rev | AGCGUAUCUCGGCGGUUGGGAAAUCGUGUCGU                  | mutating ATG codons in NS5 ORF        |
| BTV_S10_F                 | TGGAYAAAGCRATGTCAAA                               | Seg-10 based real-time PCR assay      |
| BTV_S10_R                 | ACRTCATCACGAAACGCTTC                              | BTV Seg-10 based real-time PCR assay  |
| BTV_S10_P                 | FAM-ARGCTGCATTTCGCATCGTACGC-BHQ1                  | BTV Seg-10 based real-time PCR assay  |
| q1S1-set2F                | GACCAGAACTTATCTCCGCAG                             | BTV-1 Seg-1 based real-time PCR assay |
| q1S1-set2Rbis             | GCATAACGACATCCTTTCTC                              | BTV-1 Seg-1 based real-time PCR assay |
| q1S3-set2F                | AGAGTCCAAGTCAATTATGGTC                            | BTV-1 Seg-3 based real-time PCR assay |
| q1S3-set2R                | TGTAGCCCATCCATTATATCCT                            | BTV-1 Seg-3 based real-time PCR assay |
| q1S7-set1F                | GGGTAACACAGCAAACCTC                               | BTV-1 Seg-7 based real-time PCR assay |
| q1S7-set1R                | AAGGCAGGGTATTGATTTAAGG                            | BTV-1 Seg-7 based real-time PCR assay |
| CoxIHamFor                | GATTTGGAAACTGACTTGATC                             | hamster's cytochrome oxidase I        |
| CoxIHamRev                | AGACTGTTCAACCAGTTCCAGC                            | hamster's cytochrome oxidase I        |

**Table S2:** deoxy-uracil containing primers used for mutating two ATG codons in the NS5 ORF of BTV-1 (ATG mutated to ACG), real-time PCR primers used to amplify viral RNAs derived from genome segments 1, 3, 7 or 10 of BTV and real-time PCR primers targeting hamster's cytochrome oxidase I gene.

| Primer         | Sequence (5'→3')                                   | Target      |
|----------------|----------------------------------------------------|-------------|
| IRESYFP-BsaI-F | tact <b>GGTCTCaCGAG</b> CATGCATCTAGGGCG            | ShuttleVacc |
| ShuttleBsaI-R  | tact <b>GGTCTCtTGGAT</b> CCGAATTCCTGCAGAT          | ShuttleVacc |
| NS5BTV1BsaI-F  | tact <b>GGTCTCgTCCA</b> AgGGATGACACGATTTCCCAA      | NS5         |
| NS5BTV1BsaI-R  | tact <b>GGTCTCgCTCGT</b> CACGTCATCACGAAACGCTTCTG   | NS5         |
| E3LBsaI-F      | tact <b>GGTCTCgTCCA</b> AACGATGTCTAAGATCTATATTGACG | E3L         |
| E3LBsaI-R      | tact <b>GGTCTCgCTCGT</b> CAGAATCTAATGATGACGTAAC    | E3L         |

**Table S3:** primers used to insert NS5 or E3L ORFs into the ShuttleVacc plasmid. Sequence in lower case letter represent non-specific tail to ensure efficient digestion by BsaI restriction enzyme (sequence in bold characters). Underlined sequences are target specific.
